# Supplementary material for: Schnyder corneal dystrophy-associated UBIAD1 inhibits ER-associated degradation of HMG CoA reductase in mice
Source: eLife journal article supplement (doi:10.7554/elife.44396), 2019-02-20
Supplement: supp [file elife-44396-supp-v1.zip]

Archive with 7 entries (7 files):
- elife_poa_e44396_Figure_6_figure_supplement_1.ai
- elife_poa_e44396_Figure_5_figure_supplement_1.ai
- elife_poa_e44396_Figure_2_figure_supplement_1.ai
- elife_poa_e44396_Transparent_Reporting_File.pdf
- elife_poa_e44396_Figure_7_figure_supplement_1.ai
- elife_poa_e44396_Figure_3_figure_supplement_1.ai
- elife_poa_e44396_Figure_1_figure_supplement_1.ai
